# Supplementary material for: Proof of Concept of Microbiome-Metabolome Analysis and Delayed Gluten Exposure on Celiac Disease Autoimmunity in Genetically At-Risk Infants
Source: PLoS One. 2012 Mar 14;7(3):e33387. doi: 10.1371/journal.pone.0033387 (PMC3303818; doi:10.1371/journal.pone.0033387)
Supplement: Table S3 — Antibody positivity cumulative incidence. (PDF) [file pone.0033387.s008.pdf]

**Table S3.** Antibody positivity cumulative incidence

| Exposure to Gluten | <b>Group A</b>                      | <b>Group B</b>                      |
|--------------------|-------------------------------------|-------------------------------------|
|                    | #/screened (%) Ab positive subjects | #/screened (%) Ab positive subjects |
| 6m                 | 0/13 (0%)                           | 0/13 (0%)                           |
| 12m                | 0/12 (0%) <sup>a</sup>              | 8/13 (61.5%)                        |
| 18m                | 1/11 (9.1%) <sup>a</sup>            | 5/11 (45.5%) <sup>a</sup>           |
| 24m                | 0/10 (0%) <sup>a</sup>              | 5/9 (55.5%) <sup>a,b</sup>          |

<sup>a</sup>, not all 13 subjects are included because the study is ongoing. <sup>b</sup> One of these patients develop celiac disease
